# Supplementary figures and images for: Imprinting reversible deformations on a compressed soft rod network
Source: Royal Society of Chemistry journal article supplement (doi:10.1039/d4sm00099d), 2024-01-01

Supplementary Figures:

SI Figure 1:

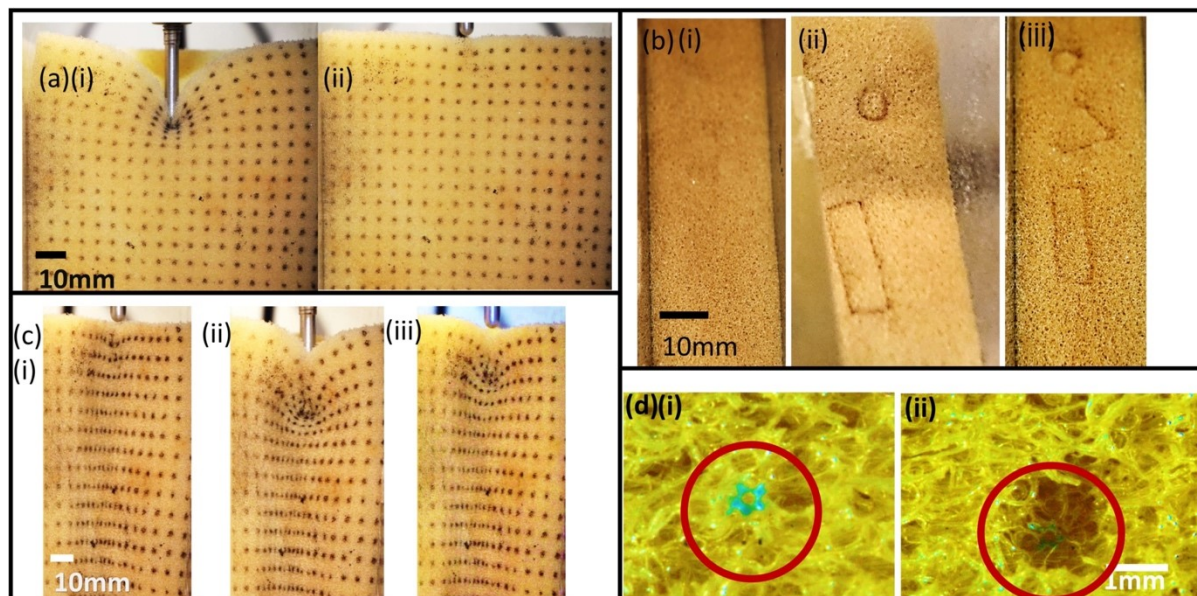

SI Figure 2

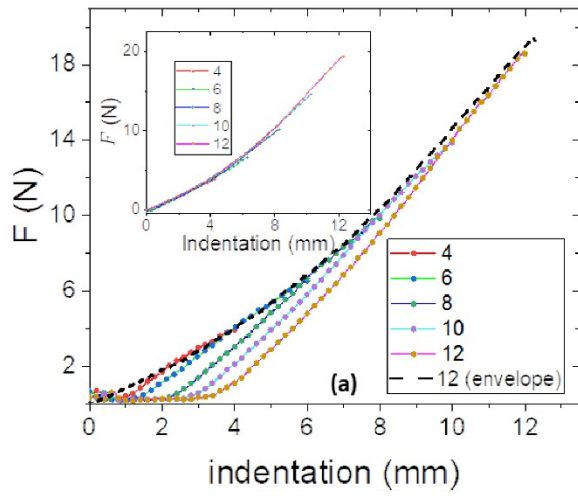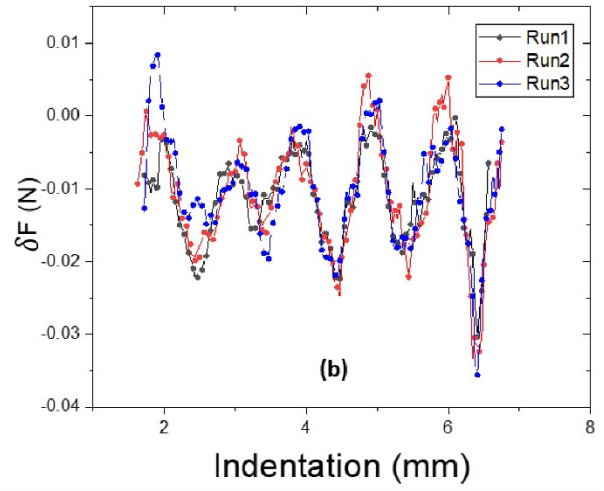

SI Figure 3

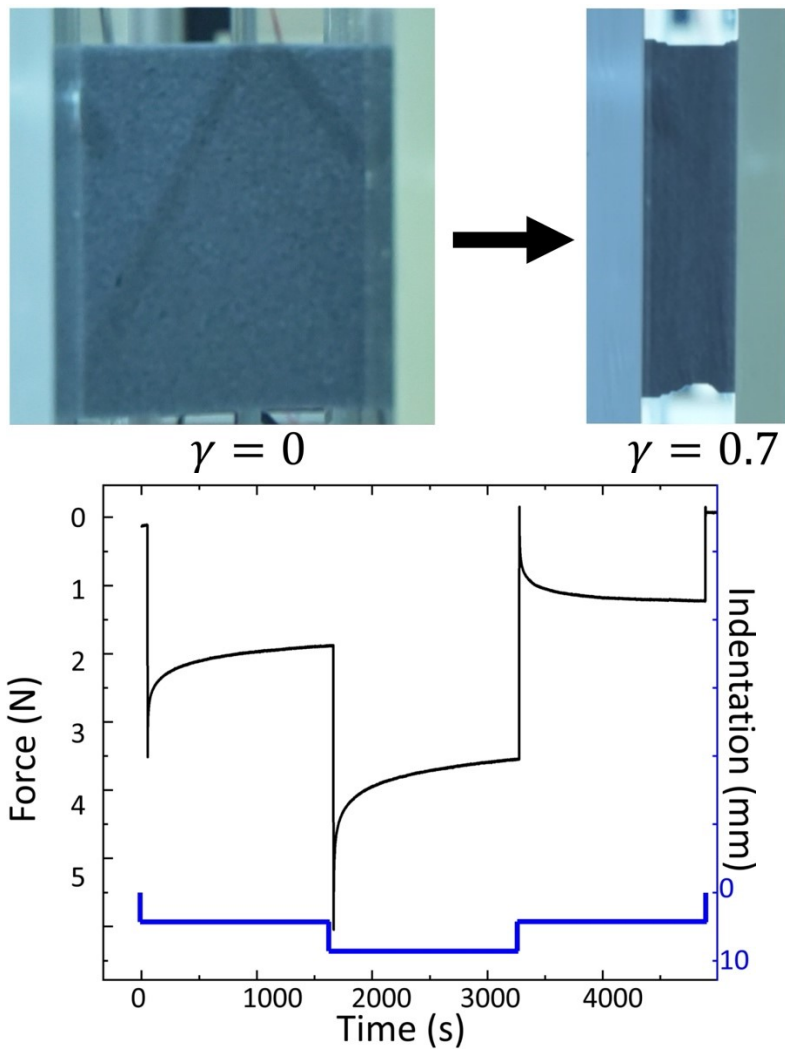

SI Figure 4:

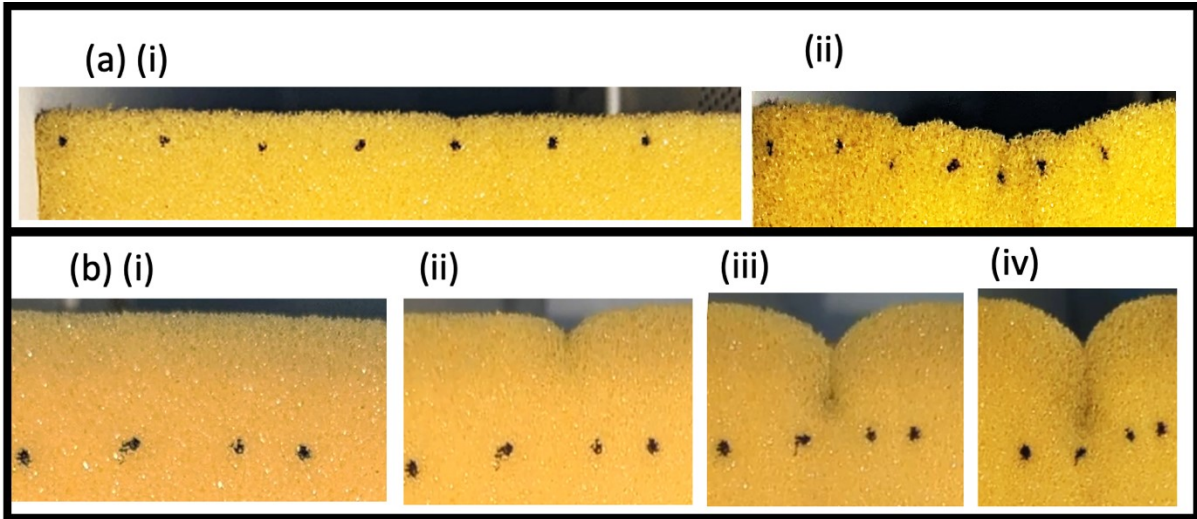

SI Figure 5:

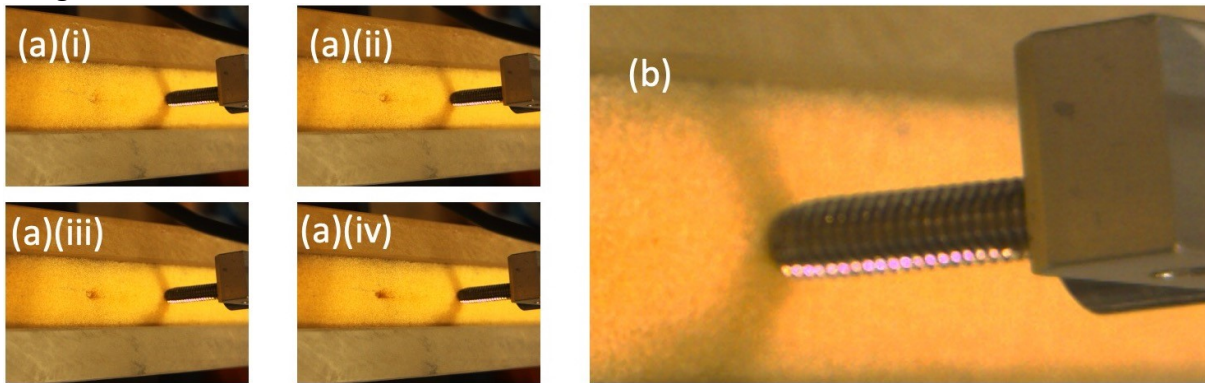

SI Figure 6:

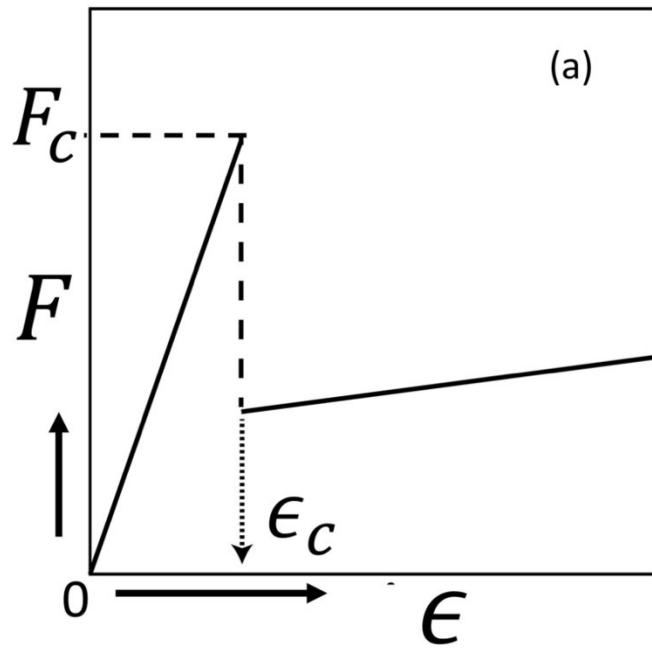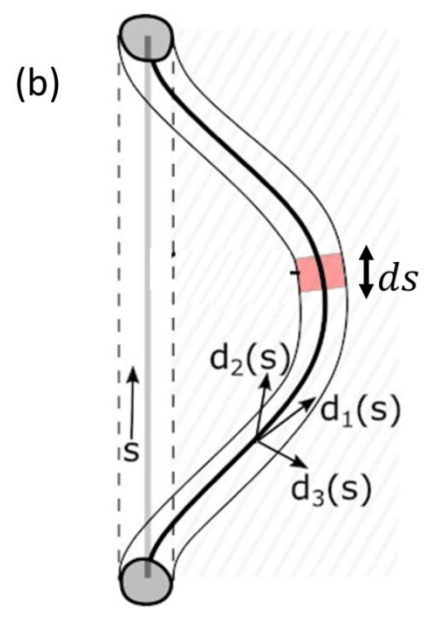

Supplement: d4sm00099d1.pdf [file d4sm00099d1.pdf]
